# Supplementary material
Source: MDPI journal article supplement (https://www.mdpi.com/1424-2818/14/12/1058)
Supplement: s1 [file s1]

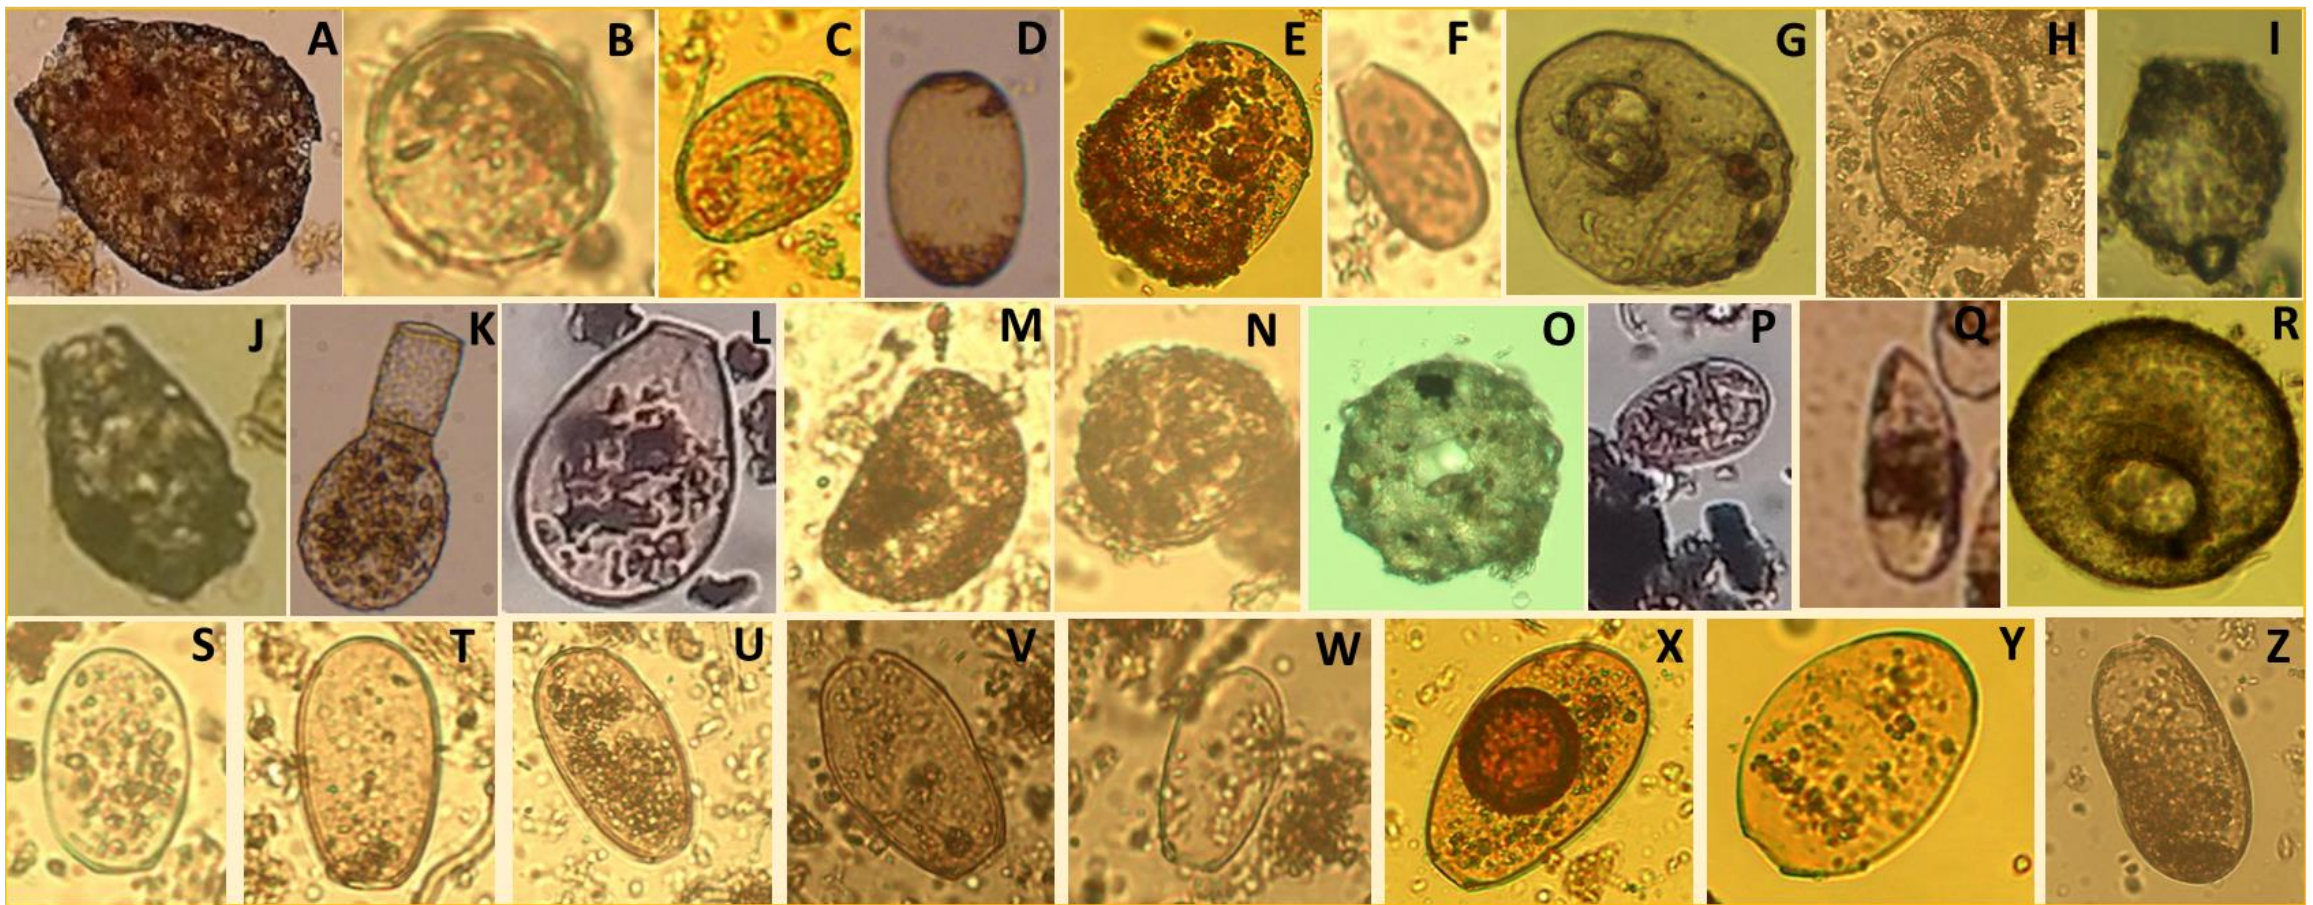

**Figure S1.** The main morphospecies of testate amoebae observed in the peat deposits of Sungai Buluh peatland (Central Sumatra, Indonesia). A - *Argynnia dentistoma*; B - *Arcella rotundata* v. *stenostoma*; C - *Arcella arenaria* v. *compressa*; D - *Archerella flavum*; E - *Centropyxis aculeata oblonga* morph 4; F - *Assulina muscorum*; G - *Centropyxis ecornis*; H - *Centropyxis aculeata* morph 2; I - *Diffflugia minuta*; J - *Diffflugia penardi* morph 2; K - *Padaungiella lageniformis* morph 3 ; L - *Nebela tinctoria*; M - *Plagiopyxis callida*; N - *Cyclopyxis eurytoma* v. *parvula* morph 3; O - *Trigonopyxis* sp1 morph 1; P - *Pseudodiffflugia gracillius*; Q - *Trinema lineare*; R - *Centropyxis aerophila sphagnicola*; S - *Hyalosphenia subflava* morph 2; T - *Hyalosphenia subflava* morph 9; U - *Hyalosphenia subflava* morph 11; V - *Hyalosphenia subflava* morph 12; W - *Hyalosphenia subflava* morph 14; X - *Hyalosphenia subflava* morph 16; Y - *Hyalosphenia subflava* morph 17; Z - *Hyalosphenia subflava* morph 18: For the shell size, see Table S1.
